# Supplementary material for: Cross-reactivity of SARS-CoV-2– and influenza A–specific T cells in individuals exposed to SARS-CoV-2
Source: JCI journal article supplement (doi:10.1172/jci.insight.158308), 2022-09-21
Supplement: sd1 [file 1]

**Supplemental Table 1.** Peptide names, sequences, protein regions and antigens used in the study.

| Peptide Name | Peptide sequence | Protein region | Antigen                                     |
|--------------|------------------|----------------|---------------------------------------------|
| YLQ*         | YLQPRTFLL        | S              | SARS-CoV-2                                  |
| LLL*         | LLLDRLNQL        | N              | SARS-CoV-2                                  |
| KLW*         | KLWAQCVQL        | ORF1ab         | SARS-CoV-2                                  |
| ALW*         | ALWEIQQVW        | ORF1ab         | SARS-CoV-2                                  |
| YLF*         | YLFDESGEFL       | ORF1ab         | SARS-CoV-2                                  |
| LLY*         | LLYDANYFL        | ORF3a          | SARS-CoV-2                                  |
| M1           | GILGFVFTL        | M              | Influenza A                                 |
| MART1        | ELAGIGILTV       | -              | Melanoma antigen<br>recognized by T cells 1 |

S= Spike protein, ORF=Open Reading Frame, N=Nucleocapsid protein, M= Matrix protein

\*Reference epitopes from Ferretti, Andrew P., et al. (2020)

**Supplemental Table 2.** iSMART clustering result of TCRs specific to M1 and immunodominant SARS-CoV-2 epitopes used in the qPCR study.

| Epitope | Unique ImmuneCODE Entries | M1 entries with exact CDR3 $\beta$ match | M1 entries with similar CDR3 $\beta$ (iSMART) |
|---------|---------------------------|------------------------------------------|-----------------------------------------------|
| LLL     | 1073                      | 6                                        | 203                                           |
| KLW     | 769                       | 0                                        | 140                                           |
| YLQ     | 1448                      | 0                                        | 287                                           |
| ALW     | 5                         | 0                                        | 0                                             |
| YLF     | 0                         | 0                                        | 0                                             |
| LLY     | 1130                      | 3                                        | 543                                           |

**Supplemental Table 3.** Pre-designed primers

| Target gene  | Assay ID      | Dye        |
|--------------|---------------|------------|
| <i>IFNG</i>  | Hs00989291_m1 | FAM/MGB    |
| <i>HPRT1</i> | Hs02800695_m1 | VIC/MGB_PL |
| <i>CD8</i>   | Hs00233520_m1 | ABY/QSY    |

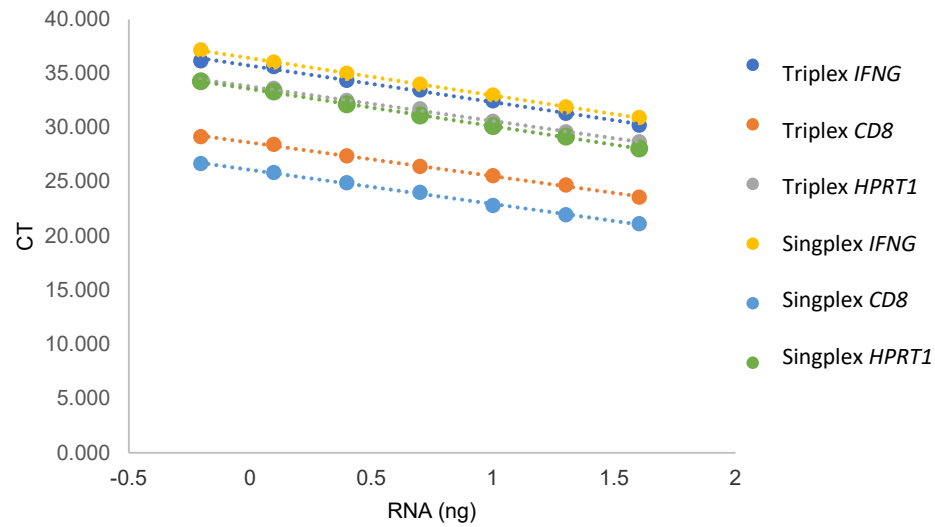

| Standard Curve       | Slope   | R <sup>2</sup> | E   |
|----------------------|---------|----------------|-----|
| Singlex <i>IFNG</i>  | -3.4427 | 0.9998         | 95  |
| Triplex <i>IFNG</i>  | -3.3599 | 0.9949         | 98  |
| Singlex <i>HPRT1</i> | -3.1892 | 0.9975         | 106 |
| Triplex <i>HPRT1</i> | -3.4307 | 0.9994         | 96  |
| Singlex <i>CD8</i>   | -3.0977 | 0.9980         | 110 |
| Triplex <i>CD8</i>   | -3.1456 | 0.9982         | 108 |

**Supplemental Figure 1.** Evaluation of RT-qPCR primer efficiencies. The amplification efficiency for each primer threshold cycle (Ct) and the logarithm of the initial RNA concentrations were plotted to calculate the slope (S) of each primer pair. Standard curves were generated from eight dilution points for each primer pair. RT-qPCR reactions for each sample were run in triplicate, with standard deviations <0.4. The efficiency of all designed primer pairs ranged from 80% to 110%, which is considered the optimal efficiency value

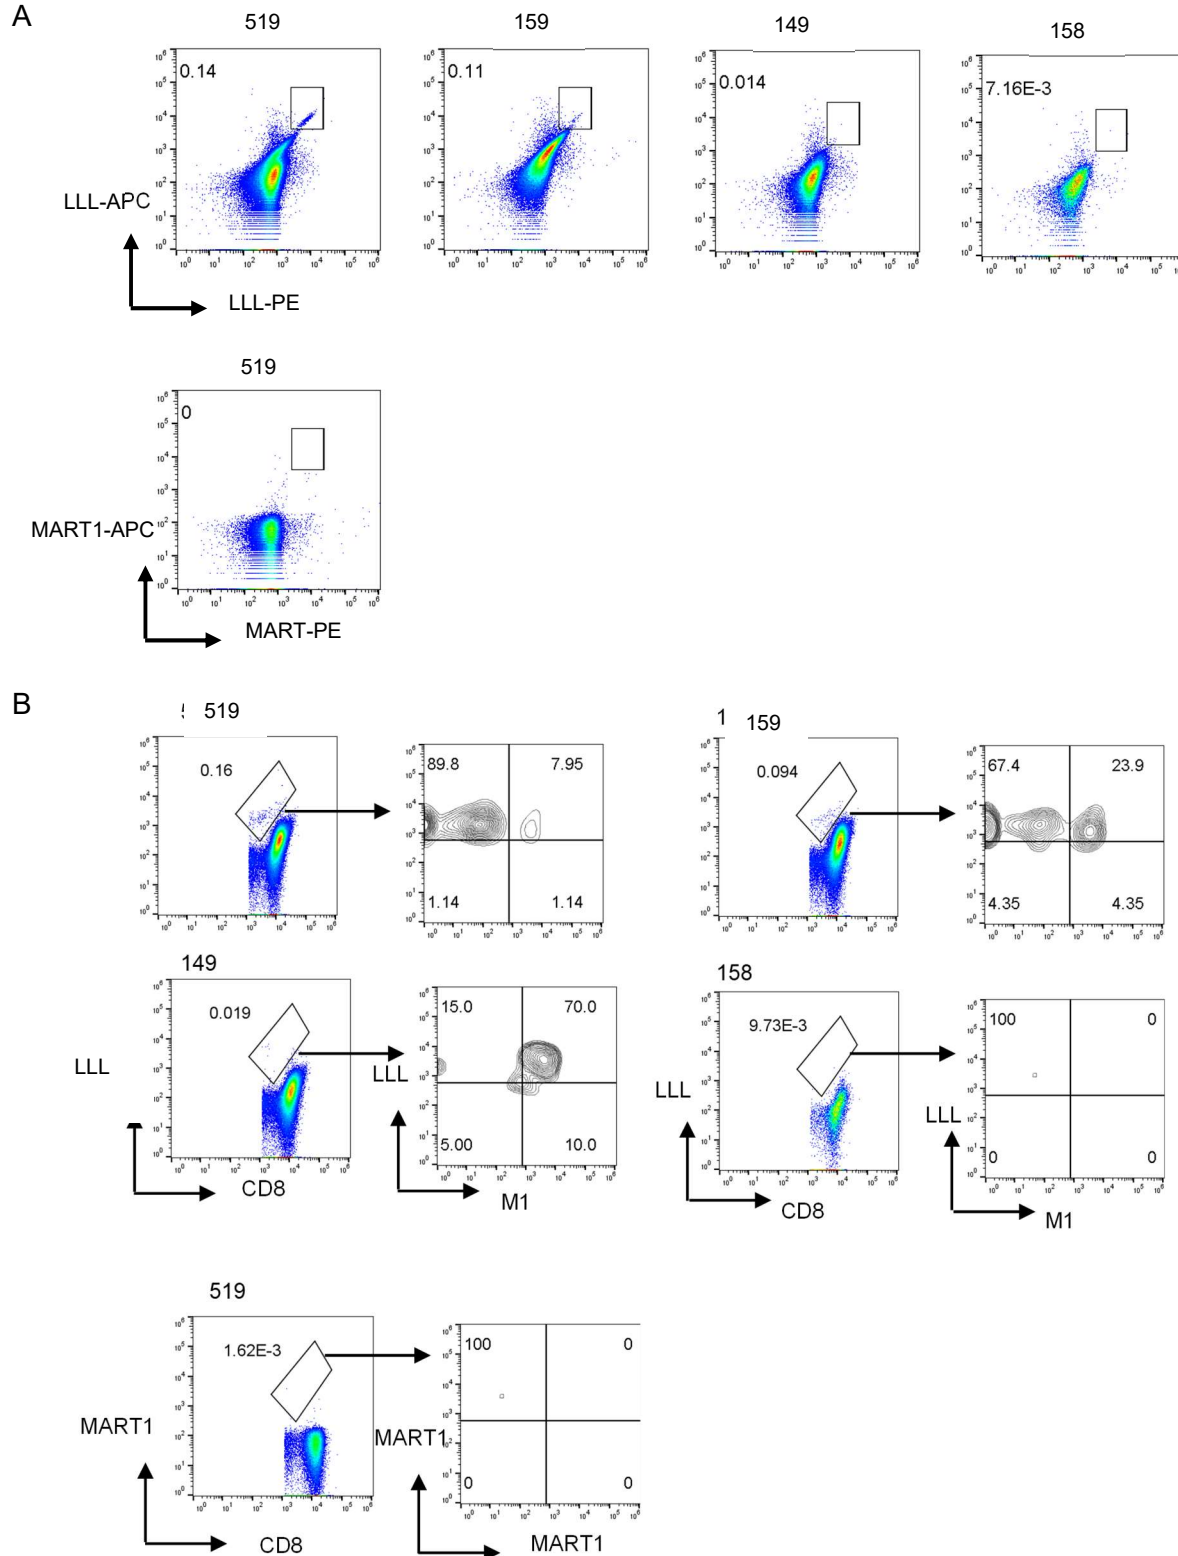

**Supplemental Figure 2** Evidence of LLL/M1 CD8 T cell cross reactivity in PBMCs of COVID-19 convalescent individuals by tetramer co-staining directly ex vivo on expanded with mixed LLL and M1 for 14 days (D14).

(A) Double staining of LLL-APC and LLL-PE demonstrated the population of LLL after expansion 14 days with mixed LLL and M1 aAPC. (B) Double staining of LLL-APC and M1-PE demonstrated the M1 population in subset of LLL population after expansion 14 days with mixed LLL and M1 aAPC. MART1 is used as a non-cognate tetramer.

149 D14 expanded with LLL and M1

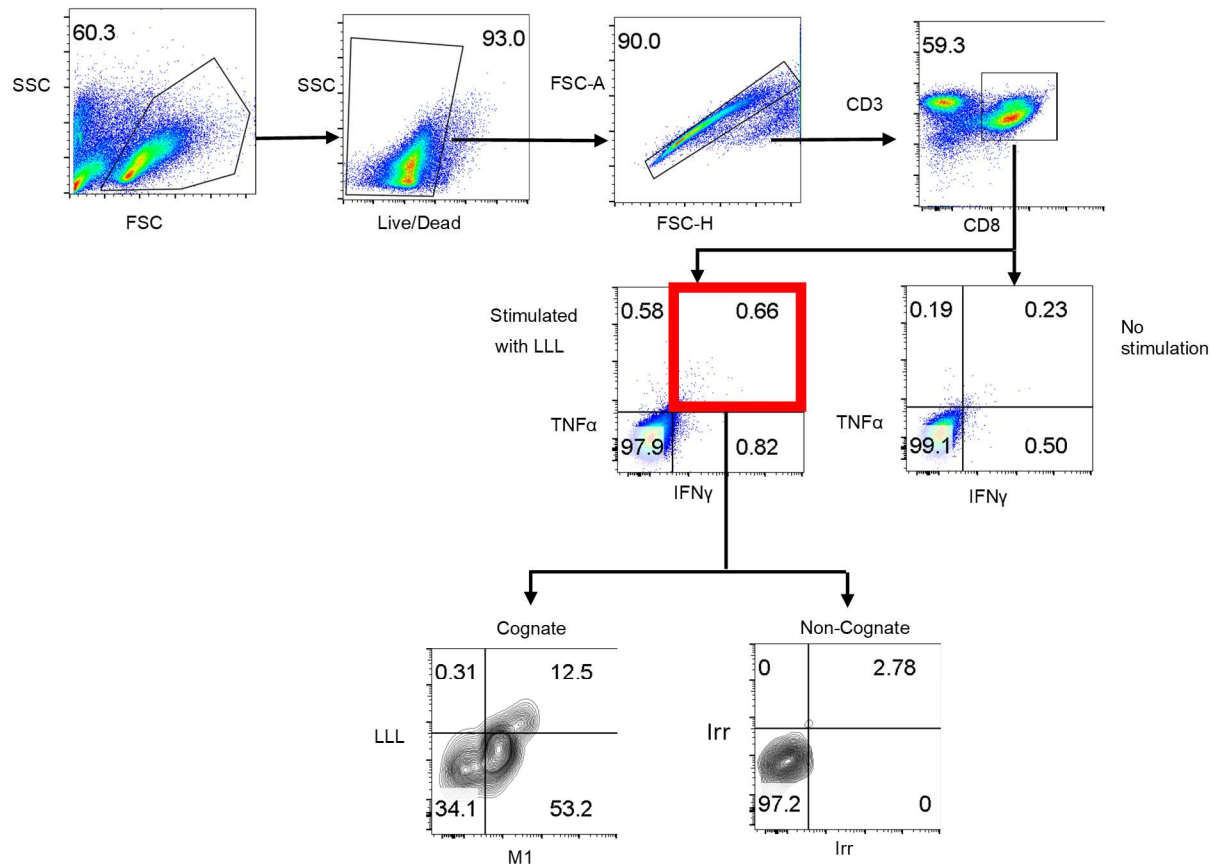

**Supplemental Figure 3.** Gating strategy for co-staining tetramers and intracellular cytokine staining (ICS) after 14 days PBMC expansion with LLL and M1 aAPC and stimulated with LLL on day 14. Negative tetramer gate is based on non-cognate staining.

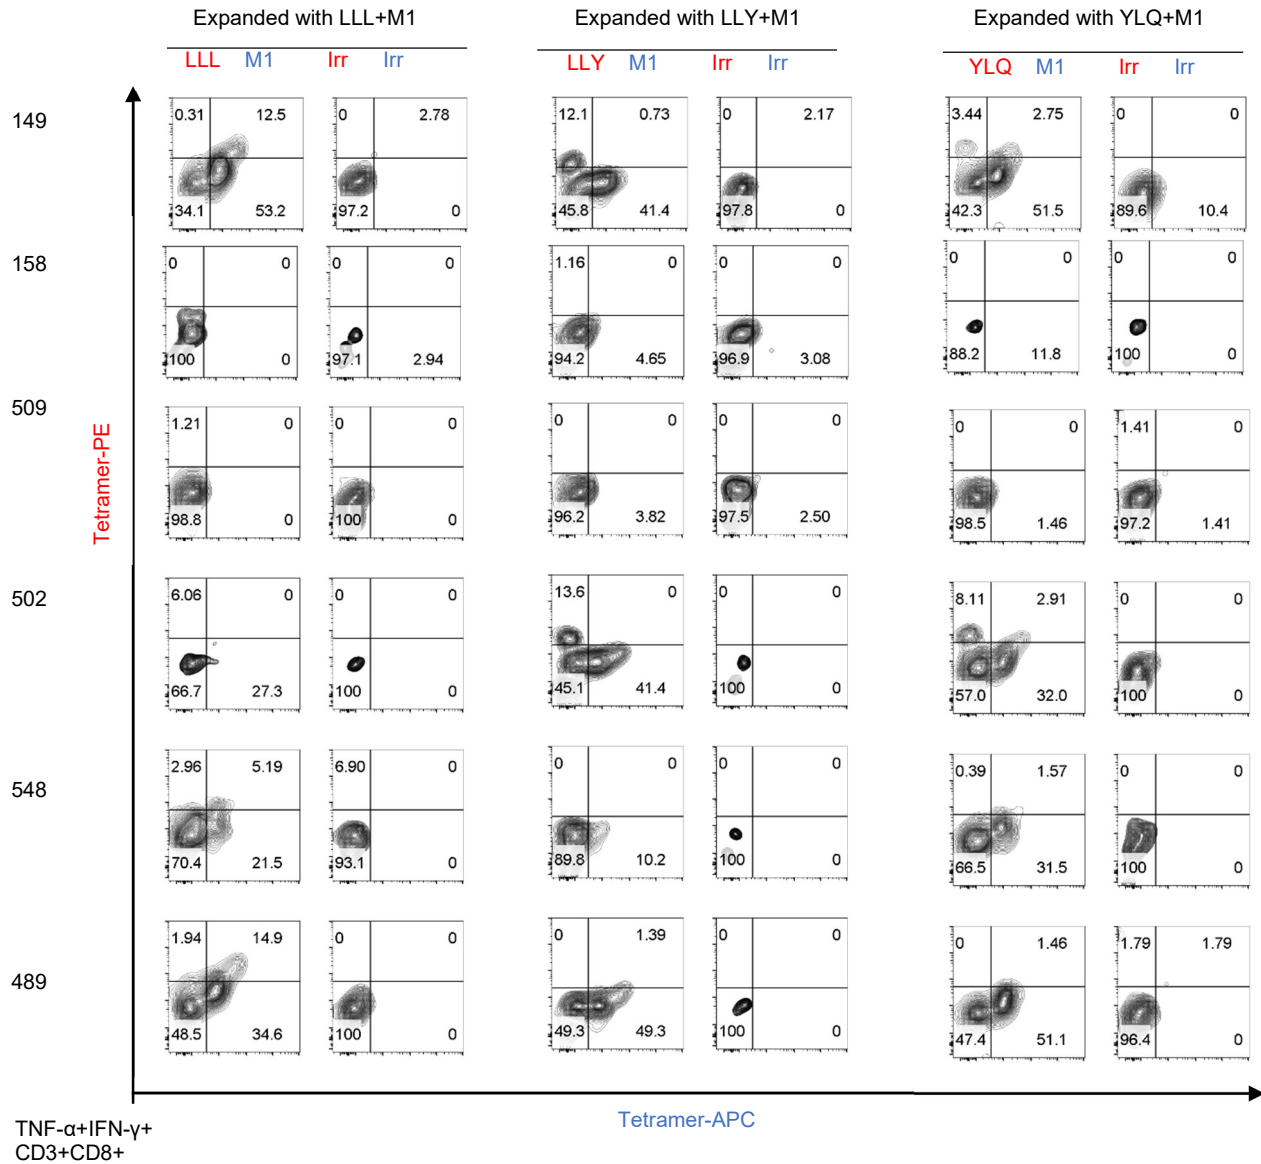

**Supplemental Figure 4.** Flow plots of TNF- $\alpha$ +IFN- $\gamma$ + CD3+CD8+ T cell populations following a 14-day expansion of PBMC from COVID-19 convalescent individuals with mixed LLL and M1. Flow plots illustrate co-staining of cytokine expressing CD8 T cells with both SARS-CoV2 tetramer (LLL, LLY and YLQ) and M1 tetramer vs irrelevant (Irr) tetramer following a brief, 6-hour stimulation with LLL aAPC.

PBMC from 9 COVID-19 convalescent donors were cultured for 14 days in the presence of mixed 1) LLL and M1 2) LLY and M1 3) YLQ and M1 aAPC before being stimulated with LLL aAPC versus no stimulation for 6 hours. The proportion of cytokine expressing CD8 T cells is denoted as % of the TNF- $\alpha$ +IFN- $\gamma$ + CD3+CD8+ population.

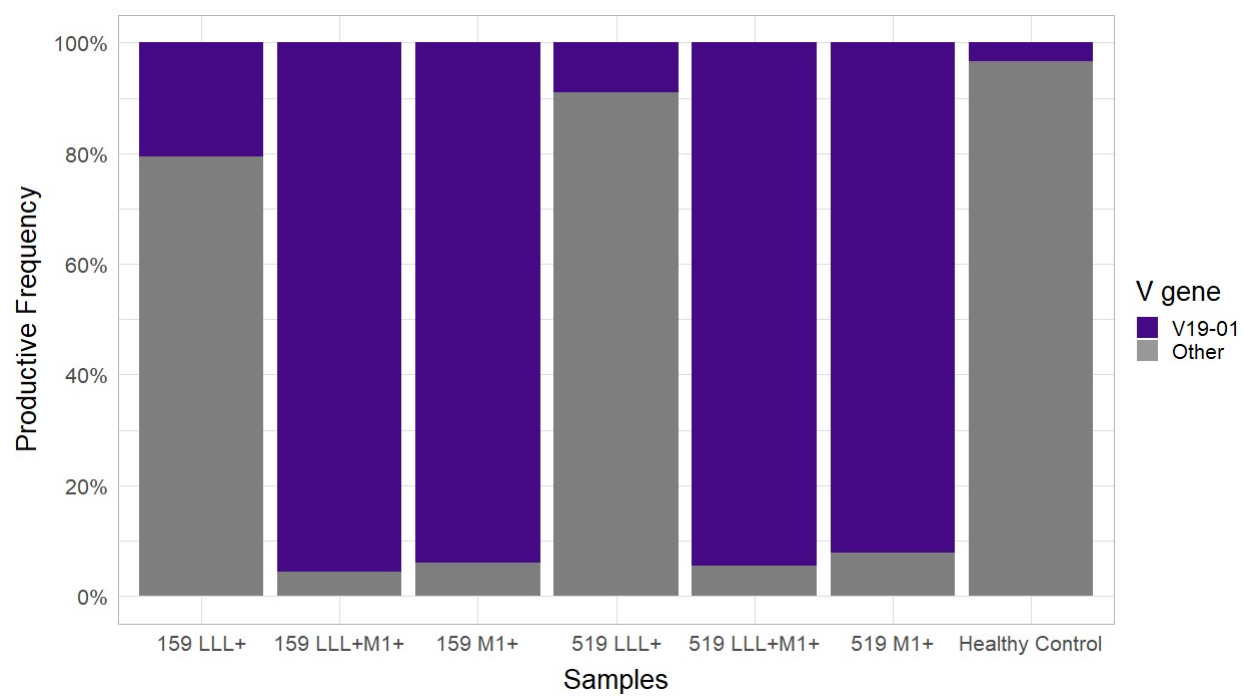

**Supplemental Figure 5.** TCRBV19-01 gene usage in all samples.
